# Supplementary material
Source: HighWire-hosted journal article supplement (https://bmjopen.bmj.com/content/13/7/e072582)
Supplement: inline-supplementary-material-1 [file inline-supplementary-material-1.pdf]

# Assessing tobacco use in Swedish young adults from self-report and urinary cotinine: a validation study using the BAMSE birth cohort

Supplementary information

Anna Zettergren, Shanzina Iasmin Sompa, Lena Palmberg, Petter Ljungman, Göran

Pershagen, Niklas Andersson, Christian H Lindh, Antonios Georgelis, Inger Kull, Erik Melén,

Sandra Ekström, Anna Bergström

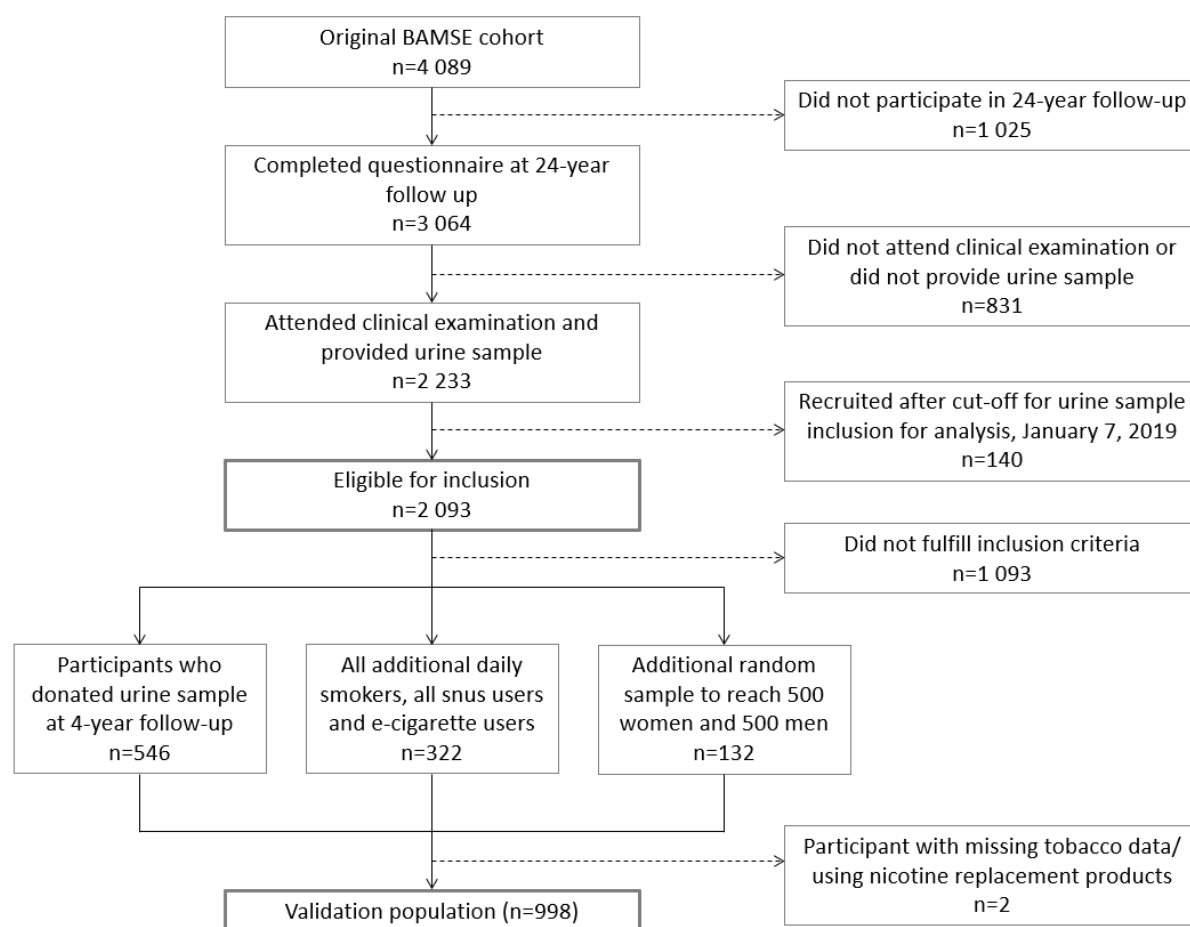

**Figure S1.** Overview of the selection process of the validation population for urine sample analysis of cotinine.

## Variable definitions:

**Age:** Age in years at questionnaire, as calculated from date of birth.

**Parental socioeconomic status:** Household economic status at enrollment in the BAMSE study. Categorized as i) blue collar worker or ii) white collar worker, based on the highest employment category of the parents.

**Any parent smoking at baseline:** Any parent smoking at baseline of the BAMSE cohort. Based on self-reported questionnaire data from parents.

**Education level:** Participants highest completed education level at the time of the 24-year follow-up questionnaire. Categorized as i) elementary school or high school and ii) university or higher.

**Occupation:** Based on questionnaire data from 24-year follow-up. Categorized as i) student, ii) working or iii) other.

**Body mass index (BMI):** Calculated as  $\text{kg/m}^2$  from weight and height measurements from the 24-year follow-up clinical examination.

**Secondhand smoke exposure:** Based on self-reported exposure from the 24-year follow-up questionnaire. Categorized as i) “yes” if daily exposed to indoor tobacco smoke (at home, work or other places), otherwise as ii) “no”.

**Asthma:** Defined based on information from the 24-year follow-up questionnaire as “yes” if participants had a doctor’s diagnosis of Asthma together with either symptoms of breathing difficulties in the last 12 months OR taking asthma medication in the past 12 months.

**Table S1.** Self-reported tobacco use in the validation population (n=998).

|                              | All<br>n=998 | Women<br>n=499 | Men<br>n=499 | p-value <sup>a</sup><br>(women vs. men) |
|------------------------------|--------------|----------------|--------------|-----------------------------------------|
| n (%)                        |              |                |              |                                         |
| <b>Cigarettes</b>            |              |                |              |                                         |
| Never                        | 588 (59.0)   | 279 (56.0)     | 309 (61.9)   | 0.054                                   |
| Former                       | 135 (13.5)   | 60 (12.0)      | 75 (15.0)    | 0.165                                   |
| Occasional                   | 125 (12.5)   | 64 (12.8)      | 61 (12.2)    | 0.774                                   |
| Daily                        | 150 (15.0)   | 96 (19.2)      | 54 (10.8)    | <0.0001                                 |
| <10 cigarettes/day           | 82 (55.4)    | 57 (60.0)      | 25 (47.2)    | 0.132                                   |
| ≥10 cigarettes/day           | 66 (44.6)    | 38 (40.0)      | 28 (52.8)    |                                         |
| <b>Snus</b>                  |              |                |              |                                         |
| Never                        | 704 (70.5)   | 429 (86.0)     | 275 (55.1)   | <0.0001                                 |
| Former                       | 37 (3.7)     | 5 (1.0)        | 32 (6.4)     | <0.0001                                 |
| Occasional                   | 75 (7.5)     | 28 (5.6)       | 47 (9.4)     | 0.023                                   |
| Daily                        | 182 (18.2)   | 37 (7.4)       | 145 (29.1)   | <0.0001                                 |
| <4 boxes of snus/week        | 99 (54.4)    | 27 (73.0)      | 72 (49.7)    | 0.011                                   |
| ≥4 boxes of snus/week        | 83 (45.6)    | 10 (27.0)      | 73 (50.3)    |                                         |
| <b>E-cigarettes</b>          |              |                |              |                                         |
| Never                        | 918 (92.0)   | 472 (94.6)     | 446 (89.4)   | 0.002                                   |
| Occasional                   | 71 (7.1)     | 24 (4.8)       | 47 (9.4)     | 0.005                                   |
| Daily                        | 9 (0.9)      | 3 (0.6)        | 6 (1.2)      | 0.315                                   |
| <b>Waterpipe</b>             |              |                |              |                                         |
| Never                        | 970 (97.4)   | 488 (97.8)     | 482 (97.0)   | 0.421                                   |
| Occasional                   | 25 (2.5)     | 10 (2.0)       | 15 (3.0)     | 0.306                                   |
| Daily                        | 1 (0.1)      | 1 (0.2)        | 0 (0)        | 0.318                                   |
| Number of tobacco types used |              |                |              |                                         |
| 1                            | 393 (77.4)   | 190 (84.1)     | 203 (72.0)   | 0.001                                   |
| >1                           | 115 (22.6)   | 36 (15.9)      | 79 (28.0)    |                                         |
| Secondhand smoke exposure    |              |                |              |                                         |
| Yes <sup>1</sup>             | 39 (4.0)     | 24 (4.9)       | 15 (3.1)     | 0.141                                   |

<sup>a</sup>: P-value from Pearson  $\chi^2$  test.<sup>b</sup>: P-value from two-tailed t-test.<sup>c</sup>: P-value from Wilcoxon rank-sum test<sup>1</sup>: Defined as daily exposure to indoor tobacco smoke.

**Table S2.** Urinary cotinine levels (ng/ml) by tobacco use categories, adjusted for specific gravity.

|                                                             | n   | Median | Mean  | SD    | 95 <sup>th</sup><br>percentile | Min-max    |
|-------------------------------------------------------------|-----|--------|-------|-------|--------------------------------|------------|
| <b>Cigarettes</b>                                           |     |        |       |       |                                |            |
| Any cigarette smoking                                       | 275 | 1 465  | 2 089 | 2 176 | 6 215                          | 0.1–14 399 |
| <i>Any cigarette smoking, mixed users excluded</i>          | 176 | 1 180  | 1 494 | 1 545 | 4 528                          | 0.1–8 238  |
| Daily cigarette smoking                                     | 150 | 2 094  | 2 390 | 1 670 | 5 264                          | 3.6–8 238  |
| <i>Daily cigarette smoking, mixed users excluded</i>        | 112 | 1 826  | 2 101 | 1 547 | 4 957                          | 3.6–8 238  |
| Occasional cigarette smoking                                | 125 | 422    | 1 728 | 2 621 | 7 449                          | 0.1–14 399 |
| <i>Occasional cigarette smoking, mixed users excluded</i>   | 64  | 109    | 433   | 787   | 1 733                          | 0.1–3 868  |
| <b>Snus</b>                                                 |     |        |       |       |                                |            |
| Any snus use                                                | 257 | 2 939  | 3 159 | 2 510 | 7 790                          | 0.3–14 399 |
| <i>Any snus use, mixed users excluded</i>                   | 174 | 2 566  | 2 834 | 2 368 | 7 381                          | 0.3–10 350 |
| Daily snus use                                              | 182 | 3 599  | 3 950 | 2 346 | 8 051                          | 1.7–14 399 |
| <i>Daily snus use, mixed users excluded</i>                 | 119 | 3 449  | 3 726 | 2 125 | 7 859                          | 1.7–10 350 |
| Occasional snus use                                         | 75  | 345    | 1 239 | 1 752 | 4 707                          | 0.3–7 790  |
| <i>Occasional snus use, mixed users excluded</i>            | 55  | 161    | 903   | 1 500 | 4 088                          | 0.3–7 790  |
| <b>E-cigarettes</b>                                         |     |        |       |       |                                |            |
| Any e-cigarette smoking                                     | 80  | 874    | 2 159 | 2 697 | 8 359                          | 0.3–9 999  |
| <i>Any e-cigarette smoking, mixed users excluded</i>        | 32  | 10.7   | 1 219 | 2 260 | 6 958                          | 0.5–8 574  |
| Daily e-cigarette smoking                                   | 9   | 2 749  | 3 643 | 2 431 | 6 998                          | 265–6 998  |
| <i>Daily e-cigarette smoking, mixed users excluded</i>      | 7   | 2 368  | 3 074 | 2 357 | 6 958                          | 265–6 958  |
| Occasional e-cigarette smoking                              | 71  | 527    | 1 971 | 2 686 | 8 574                          | 0.3–9 999  |
| <i>Occasional e-cigarette smoking, mixed users excluded</i> | 25  | 5.7    | 700   | 1 981 | 4 714                          | 0.5–8 574  |
| <b>Waterpipe</b>                                            |     |        |       |       |                                |            |
| Any waterpipe use                                           | 26  | 1 415  | 2 400 | 2 698 | 6 602                          | 0.3–9 169  |
| <i>Any waterpipe use, mixed users excluded</i>              | 9   | 2.0    | 7.2   | 10.1  | 28.9                           | 0.7–28.9   |

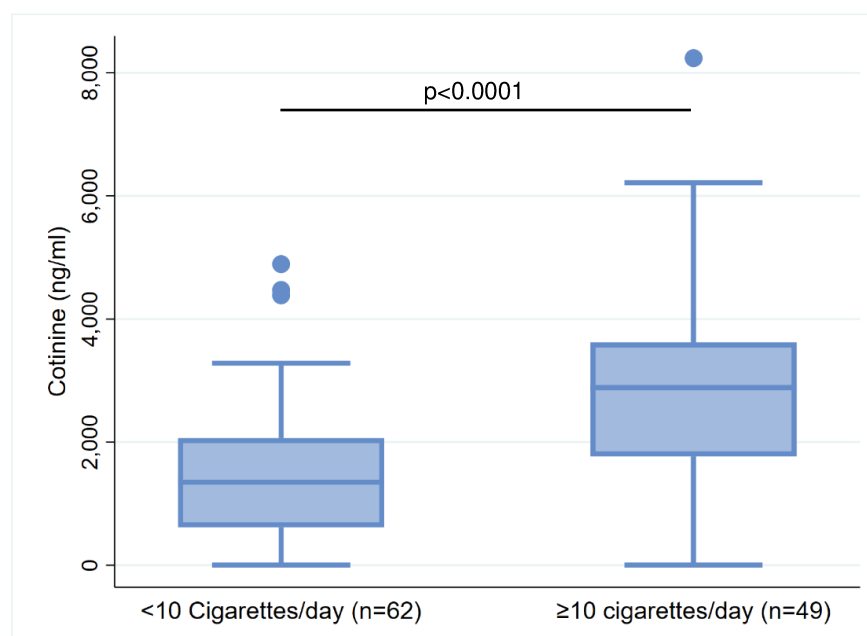

**Figure S2.** Urinary cotinine levels among daily cigarette smokers, by number of cigarettes per day. Participants with mixed tobacco use excluded.

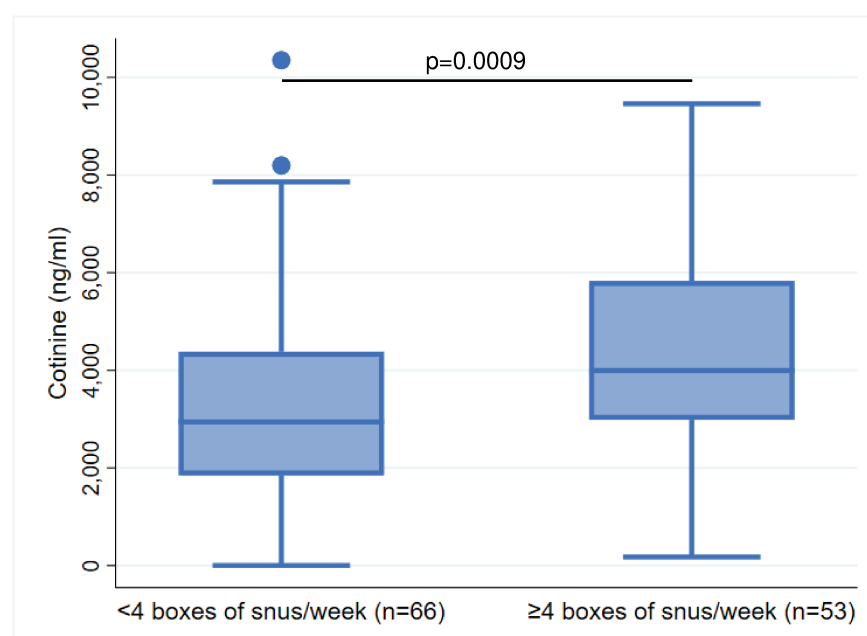

**Figure S3.** Urinary cotinine levels among daily snus users, by number of boxes snus per week. Participants with mixed tobacco use excluded.

**Table S3.** Self-reported tobacco use against urinary cotinine levels by type of tobacco and frequency of use, stratified by gender.

|                 |            |              | Women | Men   |
|-----------------|------------|--------------|-------|-------|
| Cigarettes      | Daily      | $\kappa$ :   | 0.838 | 0.801 |
|                 |            | Sensitivity: | 83.3% | 75.4% |
|                 |            | Specificity: | 97.7% | 99.0% |
|                 |            | PPV:         | 93.8% | 96.3% |
|                 |            | NPV:         | 93.4% | 92.2% |
|                 | Occasional | $\kappa$ :   | 0.592 | 0.643 |
|                 |            | Sensitivity: | 69.5% | 72.1% |
|                 |            | Specificity: | 91.7% | 92.2% |
|                 |            | PPV:         | 64.1% | 72.1% |
|                 |            | NPV:         | 93.4% | 92.2% |
|                 | Any        | $\kappa$ :   | 0.764 | 0.760 |
|                 |            | Sensitivity: | 87.9% | 85.0% |
|                 |            | Specificity: | 89.8% | 91.3% |
|                 |            | PPV:         | 81.9% | 83.5% |
|                 |            | NPV:         | 93.4% | 92.2% |
| Snus            | Daily      | $\kappa$ :   | 0.726 | 0.898 |
|                 |            | Sensitivity: | 65.4% | 89.4% |
|                 |            | Specificity: | 98.8% | 99.5% |
|                 |            | PPV:         | 91.9% | 99.3% |
|                 |            | NPV:         | 93.4% | 92.2% |
|                 | Occasional | $\kappa$ :   | 0.461 | 0.640 |
|                 |            | Sensitivity: | 47.1% | 67.3% |
|                 |            | Specificity: | 95.5% | 94.3% |
|                 |            | PPV:         | 57.1% | 74.5% |
|                 |            | NPV:         | 93.4% | 92.2% |
|                 | Any        | $\kappa$ :   | 0.691 | 0.853 |
|                 |            | Sensitivity: | 73.5% | 91.3% |
|                 |            | Specificity: | 94.4% | 93.9% |
|                 |            | PPV:         | 76.9% | 93.2% |
|                 |            | NPV:         | 93.4% | 92.2% |
| E-cigarette use | Any        | $\kappa$ :   | 0.418 | 0.658 |
|                 |            | Sensitivity: | 43.8% | 70.2% |
|                 |            | Specificity: | 95.1% | 93.9% |
|                 |            | PPV:         | 51.9% | 75.5% |
|                 |            | NPV:         | 93.4% | 92.2% |

**Cigarette smoking:** Analysis including all self-reported cigarette smokers and all non-tobacco users.**Snus use:** Analysis including all self-reported snus users and all non-tobacco users.**E-cigarette use:** Analysis including all self-reported E-cigarette users and all non-tobacco users.**Daily:** Results from analyses excluding occasional tobacco users.**Occasional:** Results from analyses excluding daily tobacco users.**Any:** Results from analyses combining daily and occasional tobacco users. **$\kappa$ :** Cohen's kappa coefficient.**PPV:** Positive predictive value**NPV:** Negative predictive value

**Table S4.** Self-reported tobacco use against urinary cotinine levels, excluding participants with mixed tobacco use or with missing data on waterpipe use (n=117 excluded).

| Self-reports      | Urinary cotinine level |           |       |              |       |            |       |
|-------------------|------------------------|-----------|-------|--------------|-------|------------|-------|
| Cigarette smoking |                        |           |       |              | Daily | Occasional | Any   |
|                   | <50 ng/ml              | ≥50 ng/ml | Total |              |       |            |       |
| No                | 455                    | 35        | 490   | κ:           | 0.784 | 0.469      | 0.725 |
| Occasional        | 28                     | 36        | 64    | Sensitivity: | 74.8% | 50.7%      | 80.0% |
| Daily             | 8                      | 104       | 112   | Specificity: | 98.3% | 94.2%      | 92.7% |
| Total             | 491                    | 175       | 666   | PPV:         | 92.9% | 56.3%      | 79.5% |
|                   |                        |           |       | NPV:         | 92.9% | 92.9%      | 92.9% |
| Snus use          |                        |           |       |              | Daily | Occasional | Any   |
|                   | <50 ng/ml              | ≥50 ng/ml | Total |              |       |            |       |
| No                | 455                    | 35        | 490   | κ:           | 0.825 | 0.478      | 0.775 |
| Occasional        | 22                     | 33        | 55    | Sensitivity: | 77.0% | 48.5%      | 81.1% |
| Daily             | 2                      | 117       | 119   | Specificity: | 99.6% | 95.4%      | 95.0% |
| Total             | 479                    | 185       | 664   | PPV:         | 98.3% | 60.0%      | 86.2% |
|                   |                        |           |       | NPV:         | 92.9% | 92.9%      | 92.9% |
| E-cigarette use   |                        |           |       |              | Any   |            |       |
|                   | <50 ng/ml              | ≥50 ng/ml | Total |              |       |            |       |
| No                | 455                    | 35        | 490   | κ:           | 0.293 |            |       |
| Occasional        | 18                     | 7         | 25    | Sensitivity: | 28.6% |            |       |
| Daily             | 0                      | 7         | 7     | Specificity: | 96.2% |            |       |
| Total             | 473                    | 49        | 522   | PPV:         | 43.8% |            |       |
|                   |                        |           |       | NPV:         | 92.9% |            |       |

**Cigarette smoking:** Analysis including self-reported cigarette smokers without other tobacco use and all non-tobacco users.

**Snus use:** Analysis including self-reported snus users without other tobacco use and all non-tobacco users.

**E-cigarette use:** Analysis including self-reported e-cigarette users without other tobacco use and all non-tobacco users.

**Daily:** Results from analyses excluding occasional tobacco users.

**Occasional:** Results from analyses excluding daily tobacco users.

**Any:** Results from analyses combining daily and occasional tobacco users.

**κ:** Cohen's kappa coefficient.

**PPV:** Positive predictive value

**NPV:** Negative predictive value

**Table S5.** Self-reported tobacco use against urinary cotinine levels for participants who provided urine samples within 6 weeks after answering the questionnaire (n=507 included).

| Self-reports      | Urinary cotinine level |           |       |              |       |            |       |
|-------------------|------------------------|-----------|-------|--------------|-------|------------|-------|
| Cigarette smoking |                        |           |       |              | Daily | Occasional | Any   |
|                   | <50 ng/ml              | ≥50 ng/ml | Total |              |       |            |       |
| No                | 216                    | 15        | 231   | κ:           | 0.867 | 0.639      | 0.785 |
| Occasional        | 22                     | 47        | 69    | Sensitivity: | 84.4% | 75.8%      | 89.5% |
| Daily             | 2                      | 81        | 83    | Specificity: | 99.1% | 90.8%      | 90.0% |
| Total             | 240                    | 143       | 383   | PPV:         | 97.6% | 68.1%      | 84.2% |
|                   |                        |           |       | NPV:         | 93.5% | 93.5%      | 93.5% |
| Snus use          |                        |           |       |              | Daily | Occasional | Any   |
|                   | <50 ng/ml              | ≥50 ng/ml | Total |              |       |            |       |
| No                | 216                    | 15        | 231   | κ:           | 0.890 | 0.643      | 0.861 |
| Occasional        | 8                      | 26        | 34    | Sensitivity: | 87.0% | 63.4%      | 89.4% |
| Daily             | 1                      | 101       | 102   | Specificity: | 99.5% | 96.4%      | 96.0% |
| Total             | 225                    | 142       | 367   | PPV:         | 99.0% | 76.5%      | 93.4% |
|                   |                        |           |       | NPV:         | 93.5% | 93.5%      | 93.5% |
| E-cigarette use   |                        |           |       |              | Any   |            |       |
|                   | <50 ng/ml              | ≥50 ng/ml | Total |              |       |            |       |
| No                | 216                    | 15        | 231   | κ:           | 0.602 |            |       |
| Occasional        | 15                     | 25        | 40    | Sensitivity: | 66.7% |            |       |
| Daily             | 0                      | 5         | 5     | Specificity: | 93.5% |            |       |
| Total             | 231                    | 45        | 276   | PPV:         | 66.7% |            |       |
|                   |                        |           |       | NPV:         | 93.5% |            |       |

**Cigarette smoking:** Analysis including all self-reported cigarette smokers and all non-tobacco users.

**Snus use:** Analysis including all self-reported snus users and all non-tobacco users.

**E-cigarette use:** Analysis including all self-reported E-cigarette users and all non-tobacco users.

**Daily:** Results from analyses excluding occasional tobacco users.

**Occasional:** Results from analyses excluding daily tobacco users.

**Any:** Results from analyses combining daily and occasional tobacco users.

**κ:** Cohen's kappa coefficient.

**PPV:** Positive predictive value

**NPV:** Negative predictive value
